# Supplementary material
Source: PubMed Central journal article supplement (PMC2923877)

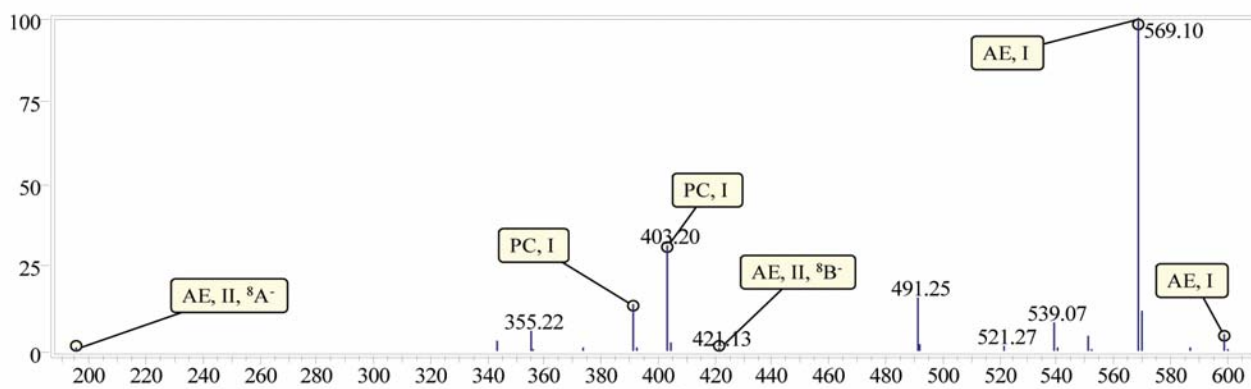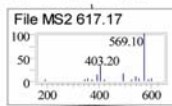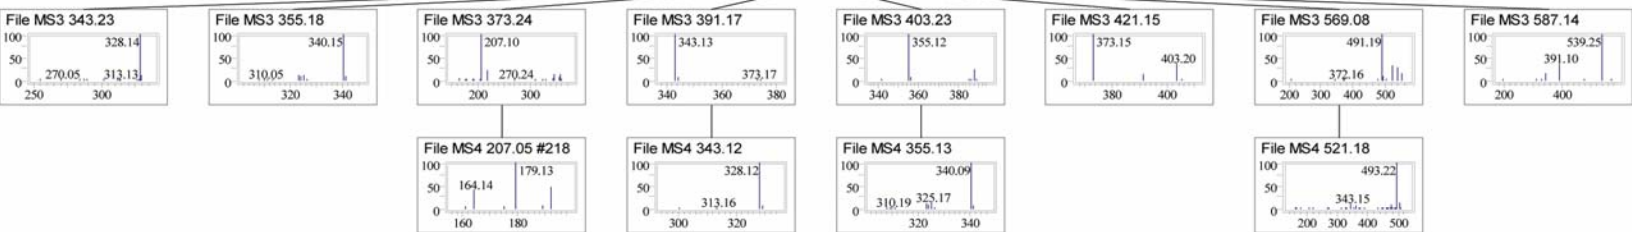

Supplement: pp.110.156489_1.pdf [file pp.110.156489_1.pdf]
